# Supplementary material for: Alterations of lipid homeostasis in morbid obese patients are partly reversed by bariatric surgery
Source: PubMed Central journal article supplement (PMC11409037; doi:10.1016/j.isci.2024.110820), 2024-08-26
Supplement: mmc1.pdf [file mmc1.pdf]

**Supplemental information**

**Alterations of lipid homeostasis in morbid**

**obese patients are partly reversed**

**by bariatric surgery**

**Flore Sinturel, Simona Chera, Marie-Claude Brulhart-Meynet, Jonathan Paz Montoya, Etienne Lefai, François R. Jornayvaz, Giovanni D'Angelo, Minoa Karin Jung, Zoltan Pataky, Howard Riezman, and Charna Dibner**

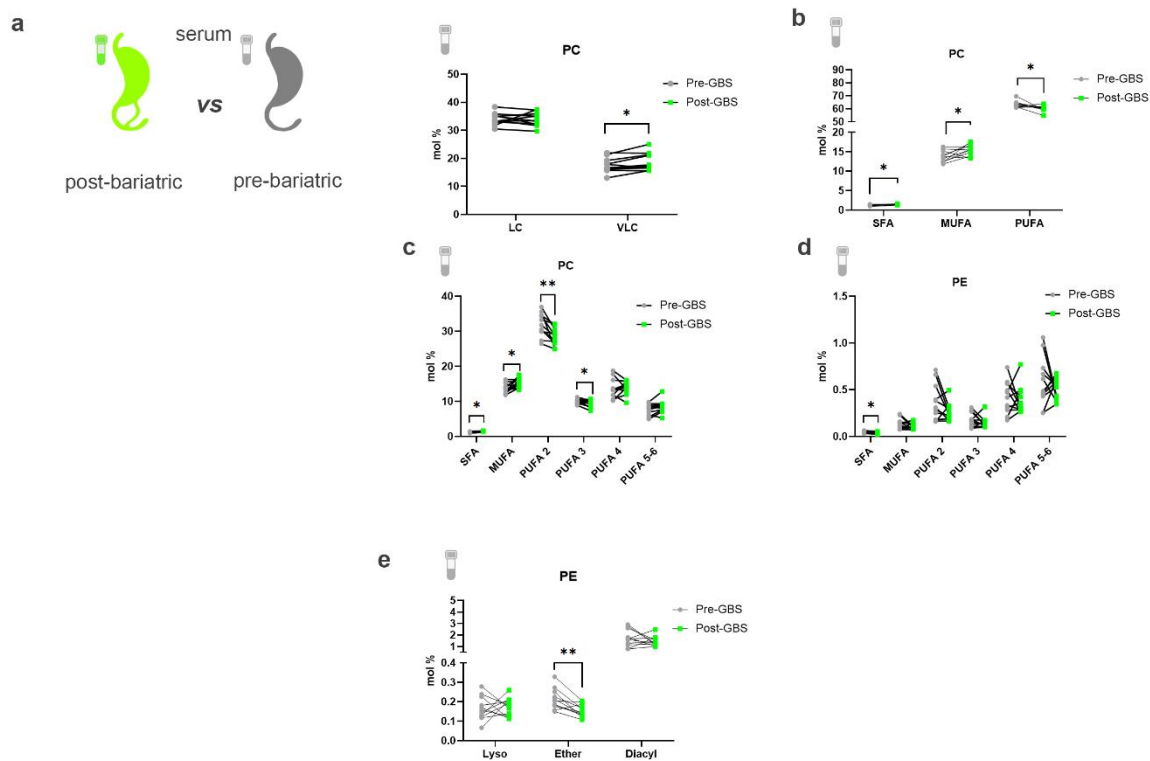

**Figure S1: Comparison of differentially abundant serum lipids measured in obese individuals before and after bariatric surgery, Related to Figure 1.**

**(a)** Relative PC level changes (mol%) in sera collected before and after GBS, clustered according to the chain length. LC (long chain C28-34), VLC (very long chain C38-44).

**(b)** Relative PC level changes (mol%) in sera collected before and after GBS, represented according to the class of saturation degree: saturated fatty acids (SFA), monounsaturated fatty acids (MUFA) and polyunsaturated fatty acids (PUFA).

**(c-d)** Relative PC **(c)** and PE **(d)** level changes (mol%) in sera collected before and after GBS, clustered according to the degree of saturation.

**(e)** Relative PE level changes (mol%) in serum collected before and after GBS, represented according to the nature of the fatty acid linkage (diacyl vs alkyl-acyl (ether) or monoacyl (lyso)).

Statistics for **(c-e)** are paired student's *t*-test. Data for serum (n = 11) pre-GBS and post-GBS are represented as mean  $\pm$  SEM. \* p < 0.05; \*\* p < 0.01.

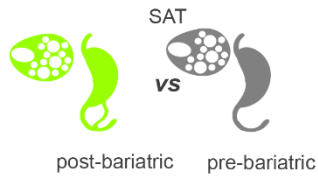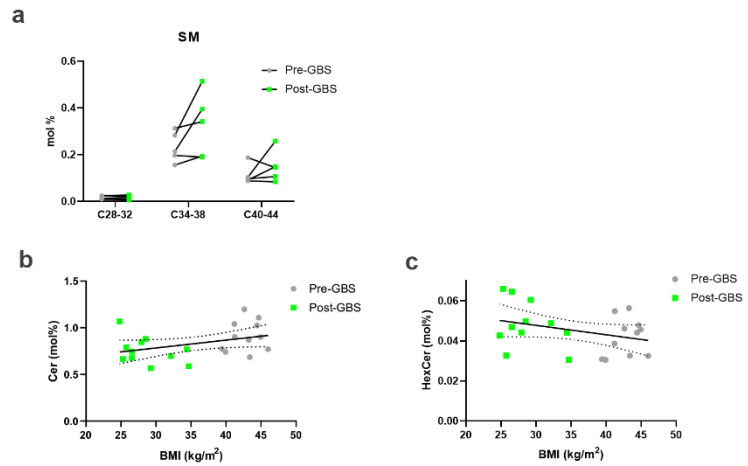

**Figure S2: Comparison of differentially abundant SAT lipids measured in obese individuals before and after bariatric surgery, Related to Figure 2.**

(a) Relative SM level changes (mol%) in sera collected before and after GBS (n = 5), represented according to the chain length. Data are represented as mean  $\pm$  SEM.

(b-c) Association between the relative levels of ceramides (b), or HexCer (c) detected in sera, and the BMI of the subjects before and after GBS (n = 22, Spearman correlation, for the ceramides  $R = 0.334$ ,  $p = 0.1291$ , for the HexCer,  $R = -0.237$   $p = 0.289$ ).

## Tables

**Table S1. Participant characteristics (cohort 1), Related to STAR Methods.**

|                                          | Pre GBS (n = 11) |              |          | Post GBS (n = 11) |              |          |                  |
|------------------------------------------|------------------|--------------|----------|-------------------|--------------|----------|------------------|
| Serum samples                            | 11               |              |          | 11                |              |          |                  |
| SAT samples                              | 5                |              |          | 5                 |              |          |                  |
| Sex                                      | M=4, F=7         |              |          |                   |              |          |                  |
| Duration between the 2 samplings (weeks) | 65.6 ± 10.41     |              |          |                   |              |          |                  |
| <b>Physical characteristics</b>          |                  |              |          |                   |              |          |                  |
|                                          |                  |              | <i>n</i> |                   |              | <i>n</i> | <i>p value</i>   |
| Age (years)                              | 37.91            | ± 8.38       | 11       | 38.91             | ± 8.49       | 11       | n/a              |
| BMI (kg. m <sup>-2</sup> )               | 42.82            | ± 2.16       | 11       | 28.72             | ± 3.54       | 11       | <b>&lt;0.001</b> |
| Total Body weight (kg)                   | 118.14           | ± 18.34      | 11       | 79.82             | ± 18.28      | 11       | <b>&lt;0.001</b> |
| Lean body mass (%)                       | 50.85            | ± 6.08       | 11       | 69.99             | ± 7.70       | 11       | <b>&lt;0.001</b> |
| Fat body mass (%)                        | 49.16            | ± 6.08       | 11       | 29.52             | ± 7.53       | 11       | <b>&lt;0.001</b> |
| Waist circumference (cm)                 | 121.18           | ± 10.72      | 11       | 95.70             | ± 14.07      | 10       | <b>0.002</b>     |
| Hip circumference (cm)                   | 129.82           | ± 7.29       | 11       | 106.9             | ± 7.17       | 10       | <b>0.002</b>     |
| Waist/hip ratio                          | 0.93             | ± 0.09       | 11       | 0.89              | ± 0.08       | 10       | 0.164            |
| <b>Laboratory values</b>                 |                  |              |          |                   |              |          |                  |
| HbA <sub>1c</sub> (mmol/mol)             | 35.5             | (38.8-34.4)  | 5        | 33.3              | (34.4-30.1)  | 7        | 0.063            |
| HOMA-IR                                  | 5.3              | (8.5-4.1)    | 5        | 0.9               | (4.0-0.4)    | 7        | 0.063            |
| Leptin (ng/mL)                           | 122.1            | (81.2–153.1) | 11       | 4.3               | (3.2–17.2)   | 11       | <b>0.004</b>     |
| Adiponectin (ug/mL)                      | 1.3              | (3.3-0.4)    | 8        | 3.9               | (6.5-2.3)    | 7        | 0.156            |
| Total Cholesterol (mg/dL)                | 197              | (176–207)    | 11       | 144               | (117–164)    | 11       | <b>0.027</b>     |
| LDL Cholesterol (mg/dL)                  | 124              | (108–144)    | 11       | 78                | (59–87)      | 11       | <b>0.010</b>     |
| HDL Cholesterol (mg/dL)                  | 43               | (40–47)      | 11       | 49                | (40–62)      | 11       | 0.391            |
| Triglycerides (mg/dL)                    | 98               | (64–155)     | 11       | 75                | (52–102)     | 11       | 0.391            |
| Fasting Insulin (mU/L)                   | 22.0             | (21.1–28.5)  | 11       | 4.1               | (1.9–15.2)   | 11       | <b>0.004</b>     |
| Fasting glucose (mg/dL)                  | 95.5             | (84.7–102.7) | 11       | 87.3              | (85.5–105.5) | 11       | 0.848            |
| hs-CRP (mg/l)                            | 8.5              | (3.3–11.9)   | 11       | 1.5               | (0.9–2.6)    | 11       | <b>0.018</b>     |
| Resistin (ng/ml)                         | 3.8              | (1.9–5.5)    | 11       | 9.3               | (6.7–12.5)   | 11       | <b>0.03</b>      |
| CCL2 (pg/ml)                             | 46.1             | (25.0–60.3)  | 11       | 15.6              | (15.6–15.6)  | 11       | <b>0.003</b>     |
| CCL5 (ng/ml)                             | 59.7             | (42.2–90.7)  | 11       | 22.2              | (14.6–27.5)  | 11       | <b>0.008</b>     |

M = male, F= female. LDL: low-density lipoprotein cholesterol. HDL: high-density lipoprotein cholesterol. hs-CRP: high sensitivity C-reactive protein. Normally distributed data are presented as means  $\pm$  SD; non-normally distributed data are presented as medians (25<sup>th</sup> - 75<sup>th</sup> percentile). Group differences were assessed with the Wilcoxon matched-pairs signed-rank test.

**Table S4. Participant characteristics (cohort 2), Related to STAR Methods.**

|                              | Serum           |               |                |               |                   | VAT             |               |                |               |                   |
|------------------------------|-----------------|---------------|----------------|---------------|-------------------|-----------------|---------------|----------------|---------------|-------------------|
|                              | Control (n = 5) |               | Obese (n = 16) |               | <i>p value</i>    | Control (n = 7) |               | Obese (n = 11) |               | <i>P value</i>    |
| Sex (M/F)                    | 3/2             |               | 6/10           |               |                   | 3/4             |               | 4/7            |               |                   |
| Age (years)                  | 52              | (46.50-63.50) | 45             | (37.00-53.20) | 0.1339            | 51              | (40-58)       | 45             | (37-55)       | 0.675             |
| BMI (kg. m <sup>-2</sup> )   | 24.01           | (20.12-24.74) | 45.34          | (42.86-47.24) | <b>&lt;0.0001</b> | 22.898          | (18.94-25.10) | 46.65          | (44.06-48.28) | <b>&lt;0.0001</b> |
| HbA <sub>1c</sub> (mmol/mol) | ND              |               | 38             | (37-38)       | n/a               | ND              |               | ND             |               | n/a               |
| Fasting glycemia (mmol/L)    | ND              |               | 5              | (4.7-5.2)     | n/a               | ND              |               | ND             |               | n/a               |

M = male; W = female; visceral adipose tissue (VAT); not determined (ND); Not applicable: (n/a). Data are presented as medians (25<sup>th</sup> - 75<sup>th</sup> percentile). Group differences were assessed with the Mann-Whitney *U* test.

**Table S5. Comparison of the major lipid classes changes in the patient cohorts 1 and 2, Related to Figures 1-4.**

TISSUE

|         | Post-GBS vs. Pre-GBS               |                                            | Obese vs. Lean  |                    |
|---------|------------------------------------|--------------------------------------------|-----------------|--------------------|
|         | <i>cohort 1</i>                    |                                            | <i>cohort 2</i> |                    |
| SERUM   | HexCer<br>PC (VLC)<br>PUFA/MUFA PE | Cer<br>SM (LC)<br>PUFA/MUFA PC<br>Ether PE | SM<br>PC (VLC)  | PC (LC)            |
| SAT/VAT | PI<br>HexCer<br>SM (LC)            |                                            | PI<br>Cer       | PC<br>SM<br>HexCer |

Red: increased levels /Green: decreased levels
